# Supplementary material for: Benchmarking state-of-the-art approaches for norovirus genome assembly in metagenome sample
Source: bioRxiv or medRxiv preprint supplement (doi:10.1101/2022.07.05.498785), 2022-07-06
Supplement: Supplementary file [file media-1.pdf]

# Supplementary materials to “Benchmarking state-of-the-art approaches for norovirus genome assembly in metagenome sample”

July 5, 2022

## 1 Software versions

1. rnaviralSPAdes, coronaSPAdes, and rnaSPAdes version 3.15.4
2. Trinity v2.13.2
3. MEGAHIT v1.2.9

## 2 Assembly command lines

### 2.1 Quality trimming

Prior to assembly all reads underwent quality trimming using BBDuk:

```
bbduk.sh threads=16 trimpolya=15 qtrim=r1 trimq=10 <input> <output>
```

### 2.2 rnaviralSPAdes, coronaSPAdes, and rnaSPAdes

rnaviralSPAdes, and rnaSPAdes were run with the default parameters using 16 CPUs, e.g.:

```
rnaviralspades.py -t 16 -1 left.fastq -2 right.fastq
```

Noroviral HMMs were provided to coronaspades.py via --custom\_hmms option:

```
coronaspades.py -t 16 -1 left.fastq -2 right.fastq --custom_hmms <hmms>
```

### 2.3 Trinity

Trinity was run with the default parameters using 16 CPUs and 128 Gb maximum memory:

```
Trinity --seqType fq --left left.fastq --right right.fastq --CPU 16 --max_memory 128G
```

### 2.4 MEGAHIT

MEGAHIT was run with the default parameters using 16 CPUs and utilizing 10% of available memory:

```
megahit -1 left.fastq -2 right.fastq -t 16 -m 0.1
```
